# Supplementary material
Source: Elsevier journal article supplement (https://authors.library.caltech.edu/101607/2/mmc1.pdf)
Supplement: mmc1 [file mmc1.pdf]

**Matter, Volume 2**

## **Supplemental Information**

### **Investigation of Cortisol Dynamics in Human Sweat Using a Graphene-Based Wireless mHealth System**

**Rebeca M. Torrente-Rodríguez, Jiaobing Tu, Yiran Yang, Jihong Min, Minqiang Wang, Yu Song, You Yu, Changhao Xu, Cui Ye, Waguih William IsHak, and Wei Gao**

**Matter, Volume 2**

## **Supplemental Information**

### **Investigation of Cortisol Dynamics in Human Sweat Using a Graphene-Based Wireless mHealth System**

**Rebeca M. Torrente-Rodríguez, Jiaobing Tu, Yiran Yang, Jihong Min, Minqiang Wang, Yu Song, You Yu, Changhao Xu, Cui Ye, Waguih William IsHak, and Wei Gao**

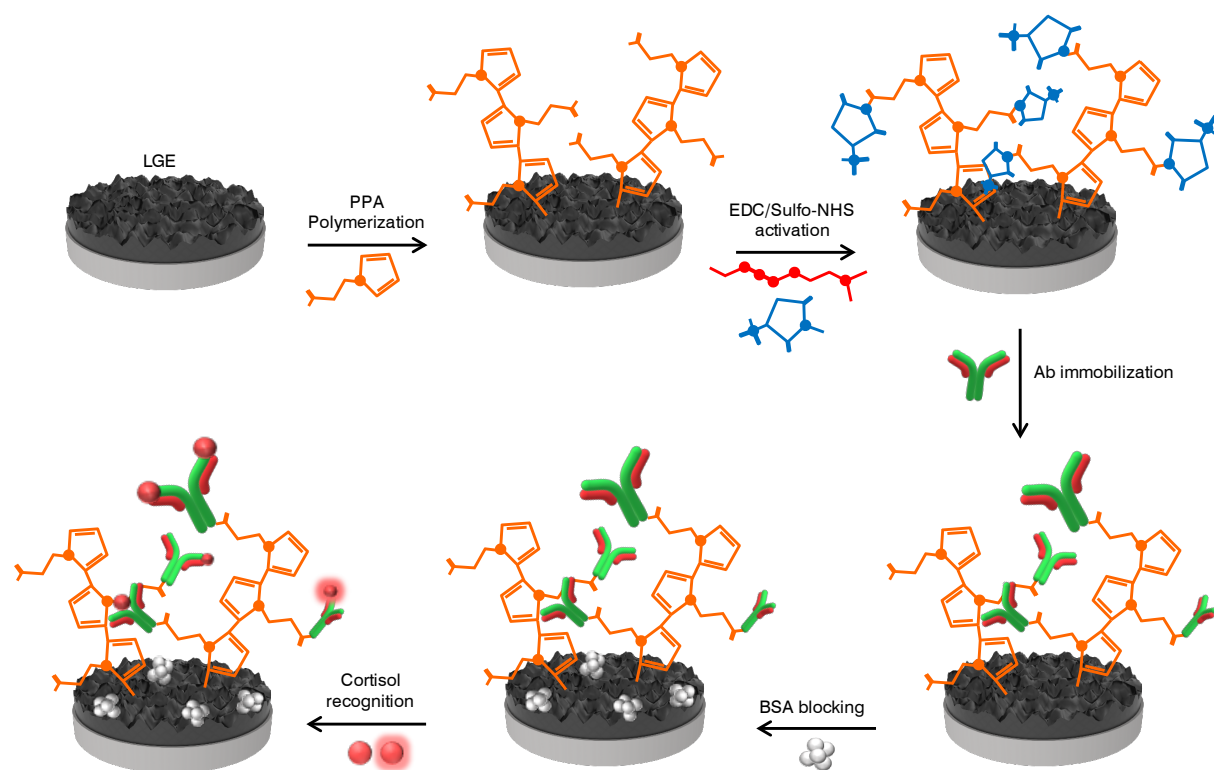

**Figure S1.** Schematic of modification procedure of the graphene electrode for cortisol sensing.

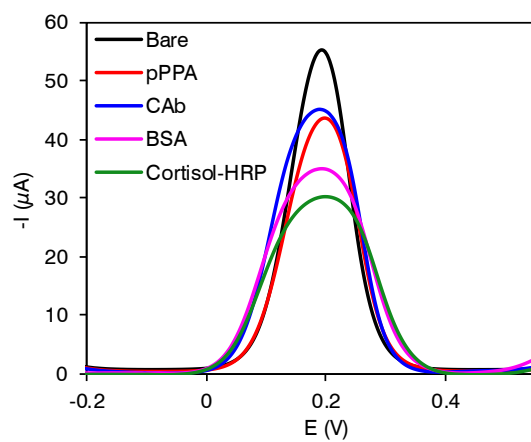

**Figure S2. Characterization of the graphene sensor.** Differential pulse voltammetry (DPV) in 2.0 mM of  $\text{K}_4\text{Fe}(\text{CN})_6/\text{K}_3\text{Fe}(\text{CN})_6$  (1:1) after each modification step.

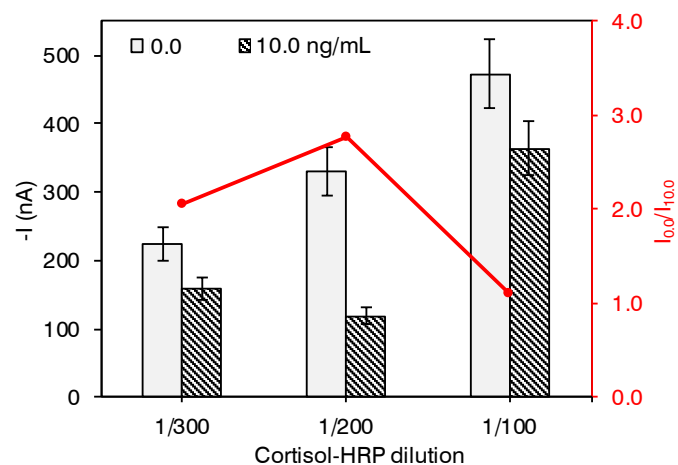

**Figure S3. Electrochemical cortisol sensor optimization.** Effect of cortisol-HRP dilution factor on amperometric signals. Data are represented as mean  $\pm$  SD ( $n = 3$ ).

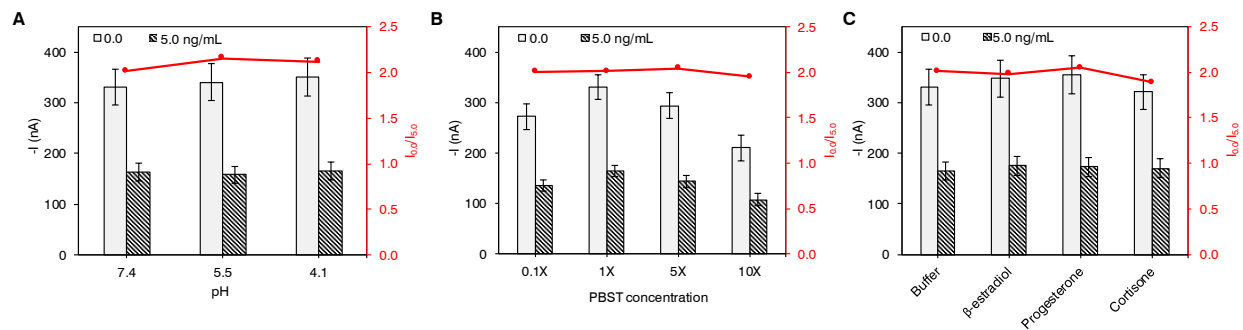

**Figure S4. Performance characterization of the graphene-based electrochemical sensors.**

Effect of various pHs (A), ionic strengths (B), and presence of interferential molecules (5.0 ng/mL)

(C). PBST, phosphate buffered saline with Tween<sup>®</sup> 20. Data are represented as mean  $\pm$  SD ( $n = 3$ ).

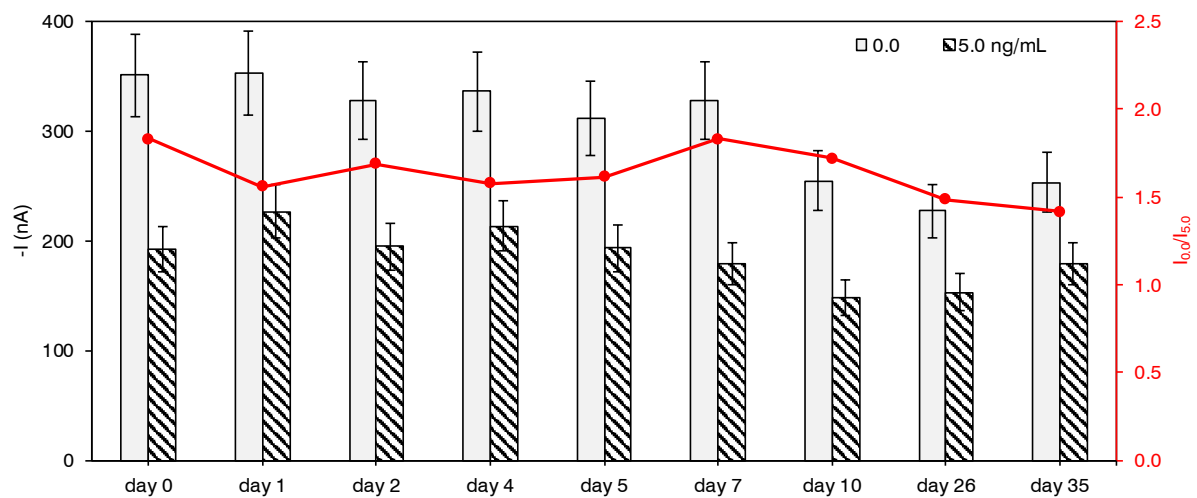

**Figure S5. Stability test of the graphene-based electrochemical sensors.** Variation of amperometric responses for 0.0 and 5.0 ng/mL cortisol with time. Data are represented as mean  $\pm$  SD ( $n = 3$ ).

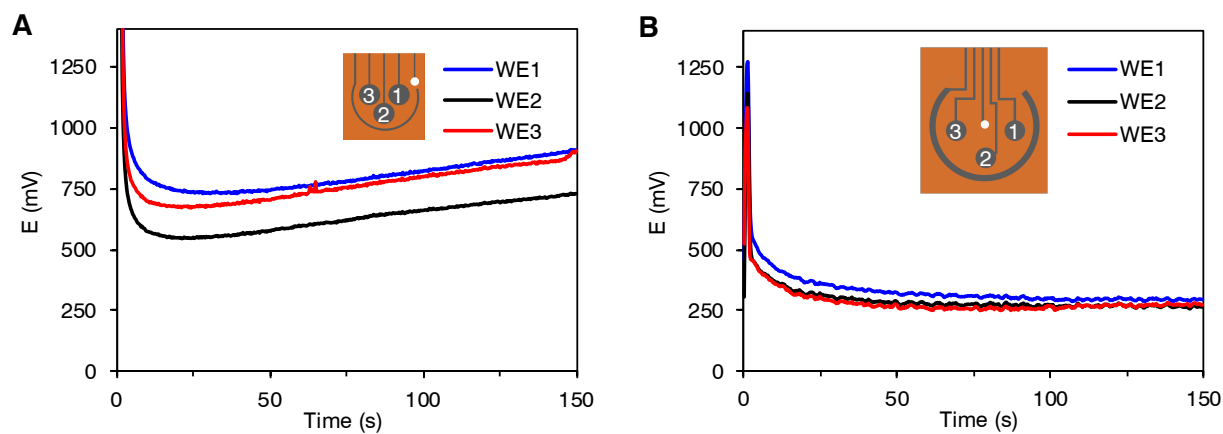

**Figure S6. Optimization of platform design.** 3-channel amperometric signals obtained with two platform designs in 1,000,000X diluted HRP-cortisol, 2.0 mM HQ and 1.0 mM  $\text{H}_2\text{O}_2$  in 50 mM phosphate buffer (pH 6.0). The platform with asymmetric working-to-reference design (A) displays larger variations in signals obtained as compared with a symmetric design (B).



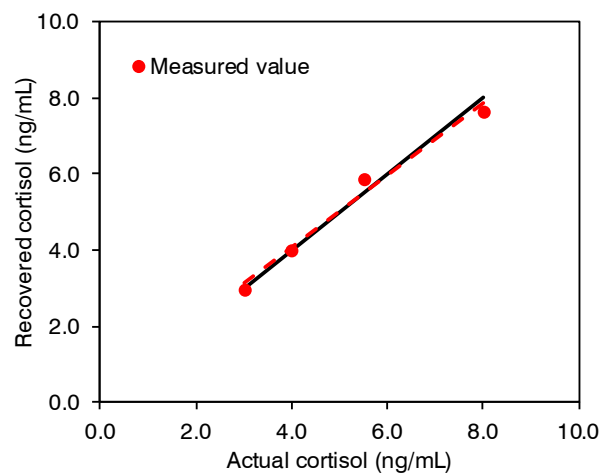

**Figure S7.** Proportional error evaluated for the GS<sup>4</sup> based on real sample recovery studies.

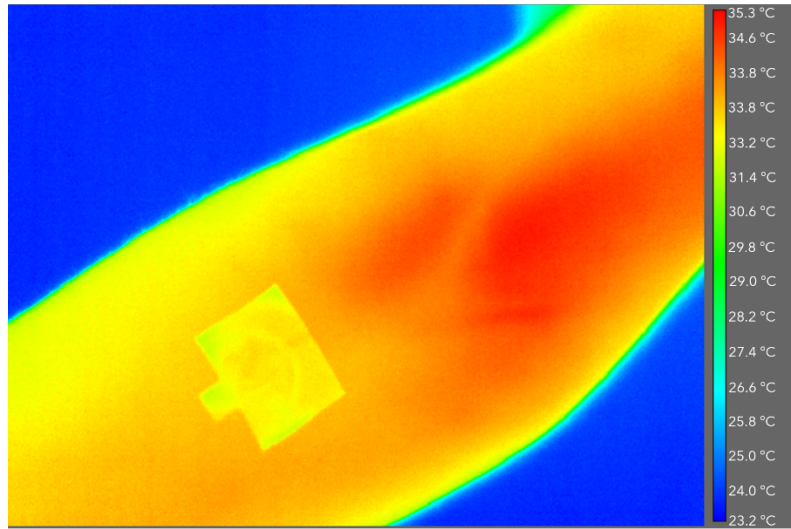

**Figure S8.** Thermal image of the sensor patch on human forearm.

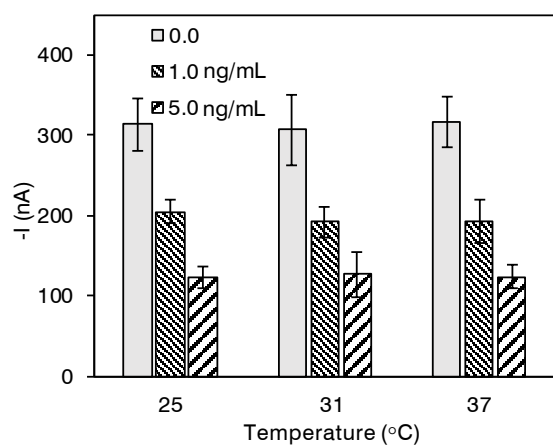

**Figure S9. Influence of temperature on sensor performance.** Amperometric responses for 0.0, 1.0 and 5.0 ng/mL cortisol incubated at room temperature (25 °C), 31 °C and 37 °C. Data are represented as mean  $\pm$  SD ( $n = 3$ ).

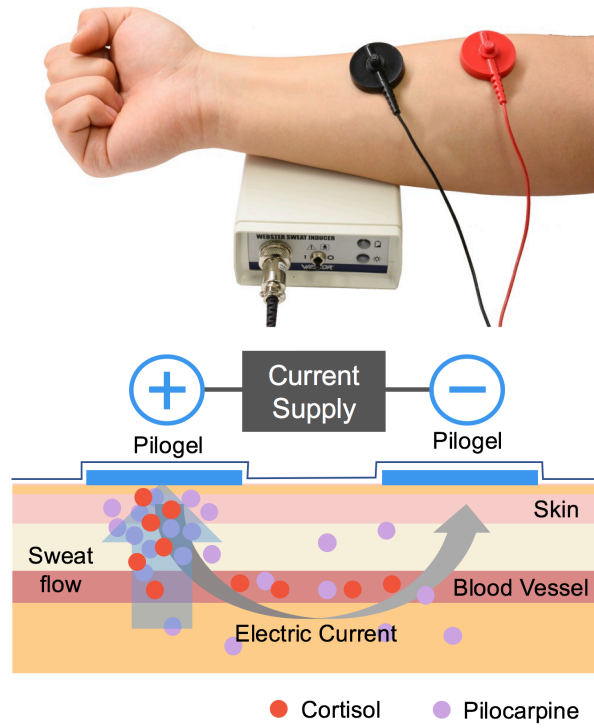

**Figure S10.** Iontophoresis based sweat sampling. Illustration of iontophoresis-assisted sweat stimulation on a subject's forearm, and principles of sweat stimulation and cortisol excretion in sweat.

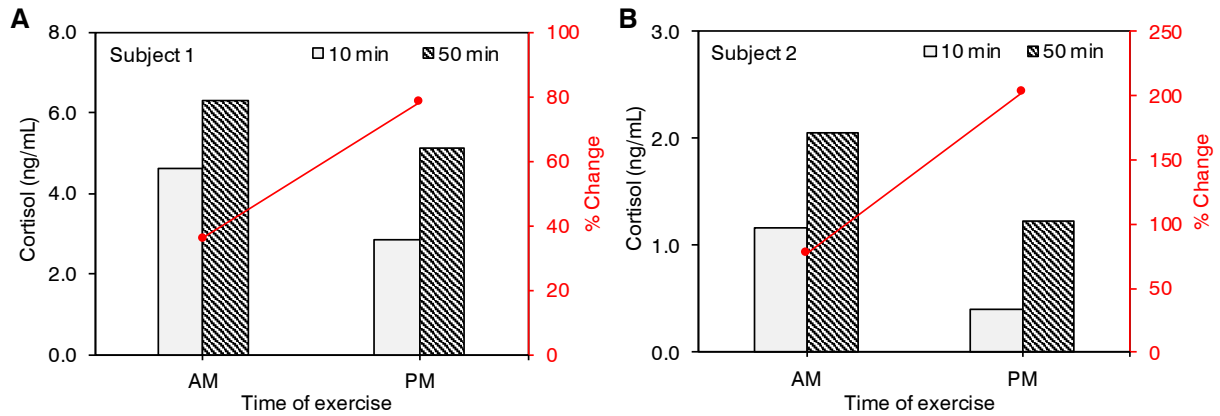

**Figure S11. Influence of time of exercise in cortisol variation.** Cortisol level evaluated in sweat and its relative percentage change of two healthy subjects before and after physical exercise conducted in the morning (AM) and in the afternoon (PM).

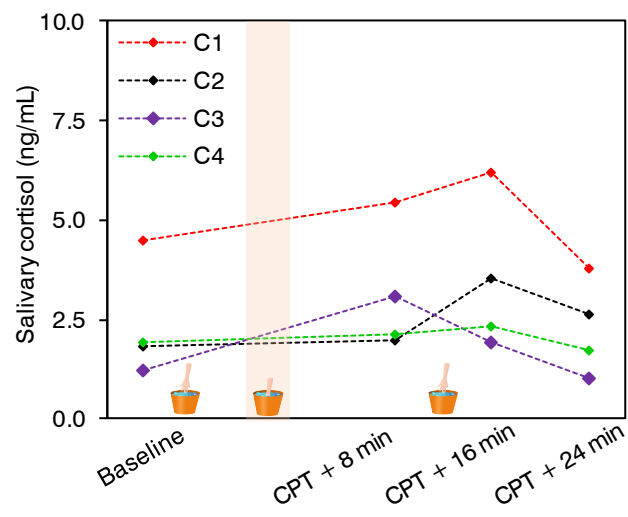

**Figure S12.** Salivary cortisol at several time points across the cold pressor test for four subjects (C1-C4) from the human study presented in Figure 5.
